# Supplementary material for: Three-dimensional mesomeric networks assembled from helix-linked sheets: syntheses, structures, and magnetisms
Source: Royal Society of Chemistry journal article supplement (doi:10.1039/b502651b), 2005-01-01
Supplement: b502651b.pdf [file b502651b.pdf]

## Supplementary Information

**Title:** Three-Dimensional Mesomeric Networks Assembled from Helix-Linked Sheets: Syntheses, Structures, and Magnetisms

**Authors:** Chao Qin, Xin-Long Wang, Yang-Guang Li, En-Bo Wang,\* Zhong-Min Su,\* Lin Xu, and Rodolphe Clérac\*

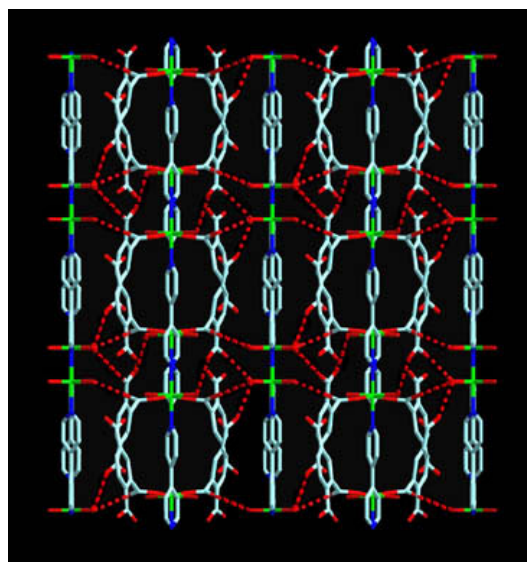

**Fig. S1** The 3D supramolecular architecture along the *c* axis formed by the hydrogen-bonded linkages of anionic and cationic chains.

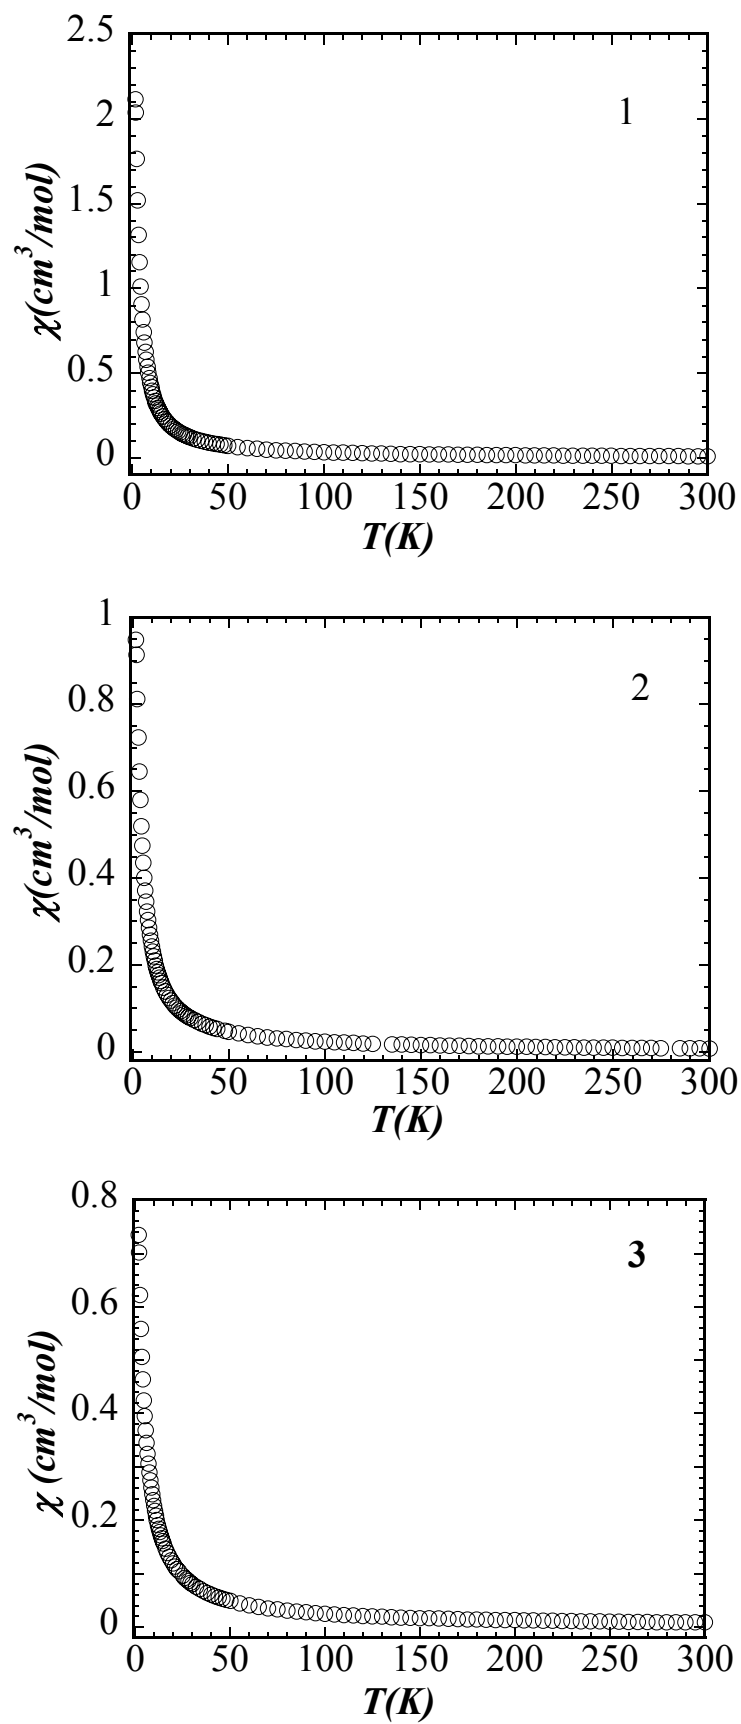

**Fig. S2** Temperature dependence of susceptibility for **1**, **2** and **3**. The susceptibility given is per three

Ni sites for **1** and two Ni sites for **2** and **3**.
